# Supplementary material
Source: PubMed Central journal article supplement (PMC5263184)
Supplement: NIHMS832348-supplement-1.pdf [file NIHMS832348-supplement-1.pdf]

Figure S1 Brockmann L. et al.

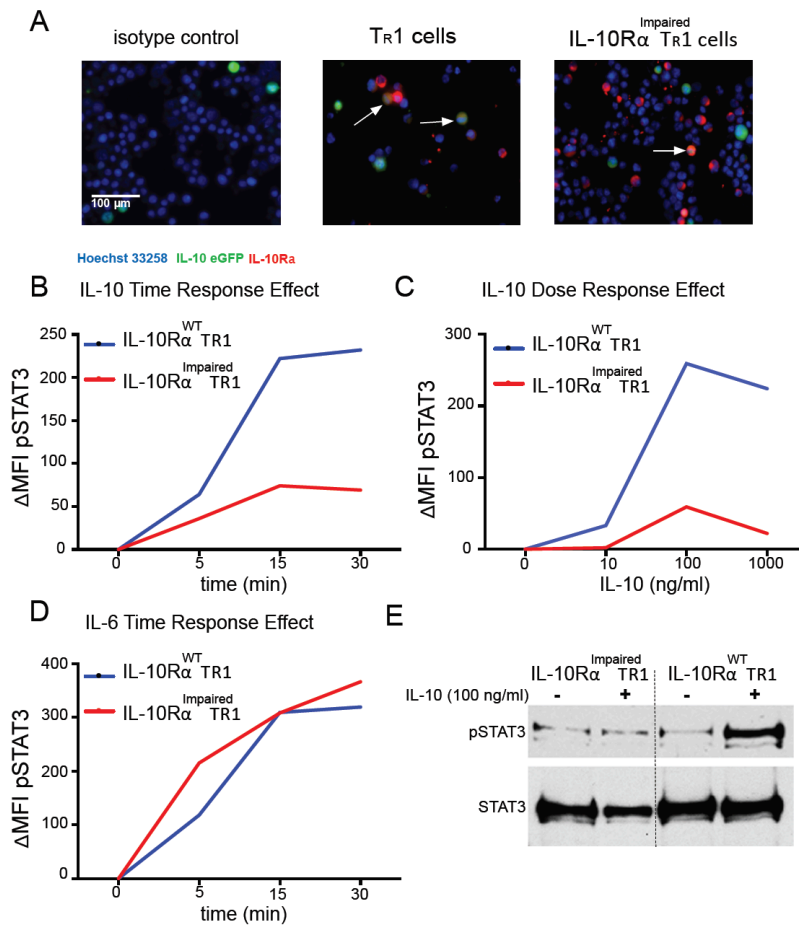

**Fig. S1. *In vitro* differentiated  $T_{R1}$  cells can respond to IL-10.** (A) Immunofluorescence staining of  $IL-10R\alpha$  expression on *in vitro* differentiated  $IL-10R\alpha^{WT}$  or  $IL-10R\alpha^{Impaired}$   $T_{R1}$  cells. Data are representative of two independent experiments. (B-C) Naïve  $CD4^+$  T cells were isolated from wild type ( $IL-10R\alpha^{WT}$ ) or  $CD4$ -DNIL-10R transgenic ( $IL-10R\alpha^{Impaired}$ )  $Foxp3^{RFP}$   $IL-10^{eGFP}$  double reporter mice and cultured under  $T_{R1}$  polarizing conditions. FACS-sorted  $T_{R1}$  cells ( $CD4^+IL-10^+Foxp3^-$ ) were re-stimulated in the presence or absence of IL-10.  $\Delta$ MFI (compared to unstimulated cells) of pSTAT3 level as assessed by flow cytometry are shown. Cells were stimulated with IL-10 (B) or IL-6 (C) for indicated time points. (D)  $IL-10R\alpha^{WT}$  or  $IL-10R\alpha^{Impaired}$   $T_{R1}$  cells were stimulation for 20 min with the indicated concentrations of IL-10. Data are representative of two independent experiments, and were confirmed using Immunoblotting (three independent experiments) (E).

Figure S2 Brockmann L. et al.

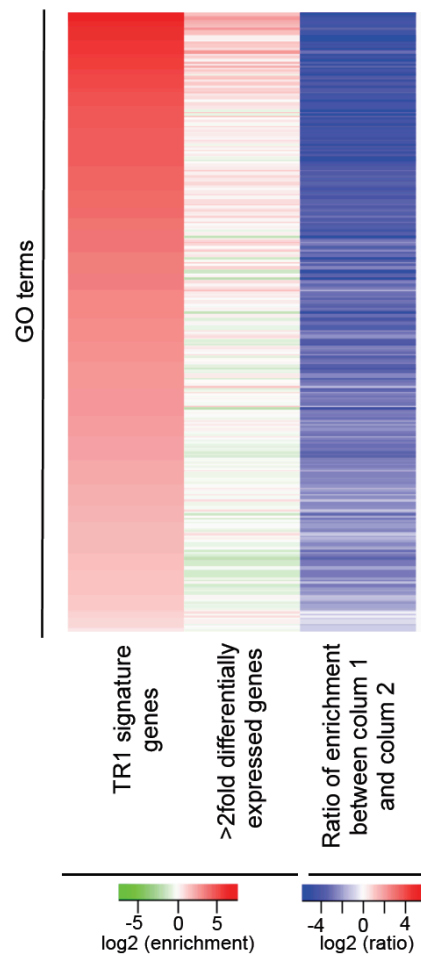

**Fig. S2. More than two fold differentially expressed genes are not enriched over GO terms significantly enriched for  $T_{R1}$  signature genes.** Enrichment scores of  $T_{R1}$  signature genes and >2-fold differentially expressed genes over GO terms significantly enriched for  $T_{R1}$  signature genes. Enrichment scores (columns 1 and 2) are shown in log-scale for visualization. Column 3 shows the ratio in enrichment >2-fold differentially expressed genes versus  $T_{R1}$  signature genes in log-scale for visualization.

Figure S3 Brockmann L. et al.

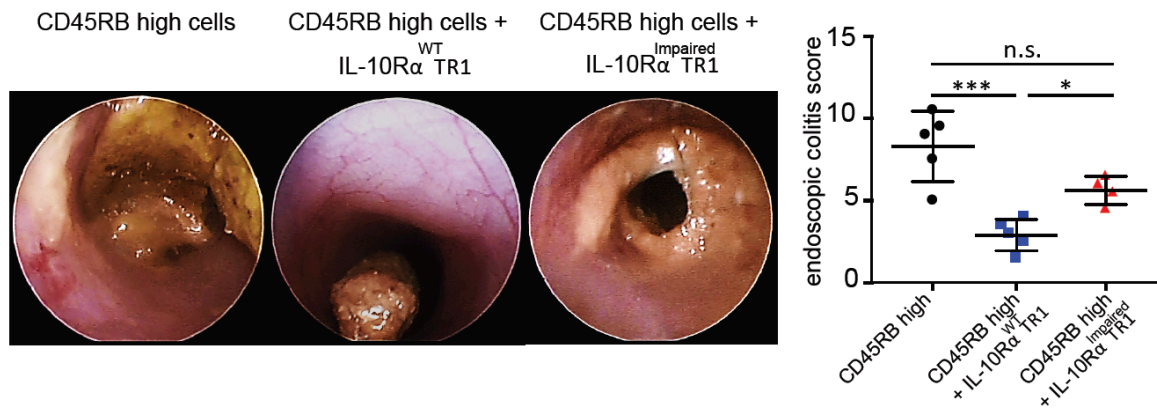

**Fig. S3. IL-10 signaling in  $T_{R1}$  cells is essential to prevent  $CD4^{+}Foxp3^{-}CD45RB^{hi}$  T cell mediated colitis.** *In vitro* differentiated  $IL-10R\alpha^{WT}$  or  $IL-10R\alpha^{Impaired}$   $T_{R1}$  were injected alone or together with  $CD4^{+}Foxp3^{-}CD45RB^{hi}$  T cells into  $Rag1^{-/-}$  mice. Endoscopy score 5 weeks upon transfer of two independent experiments are shown ( $CD45RB^{hi}$  n=5,  $CD45RB^{hi}+WT$   $T_{R1}$  n=5,  $CD45RB^{hi}+IL-10R\alpha^{Impaired}$   $T_{R1}$  n=4). One-way ANOVA (post-test Tukey) was used to calculate significance (\*  $p < 0.05$ ; \*\*\*  $p < 0.001$ ).

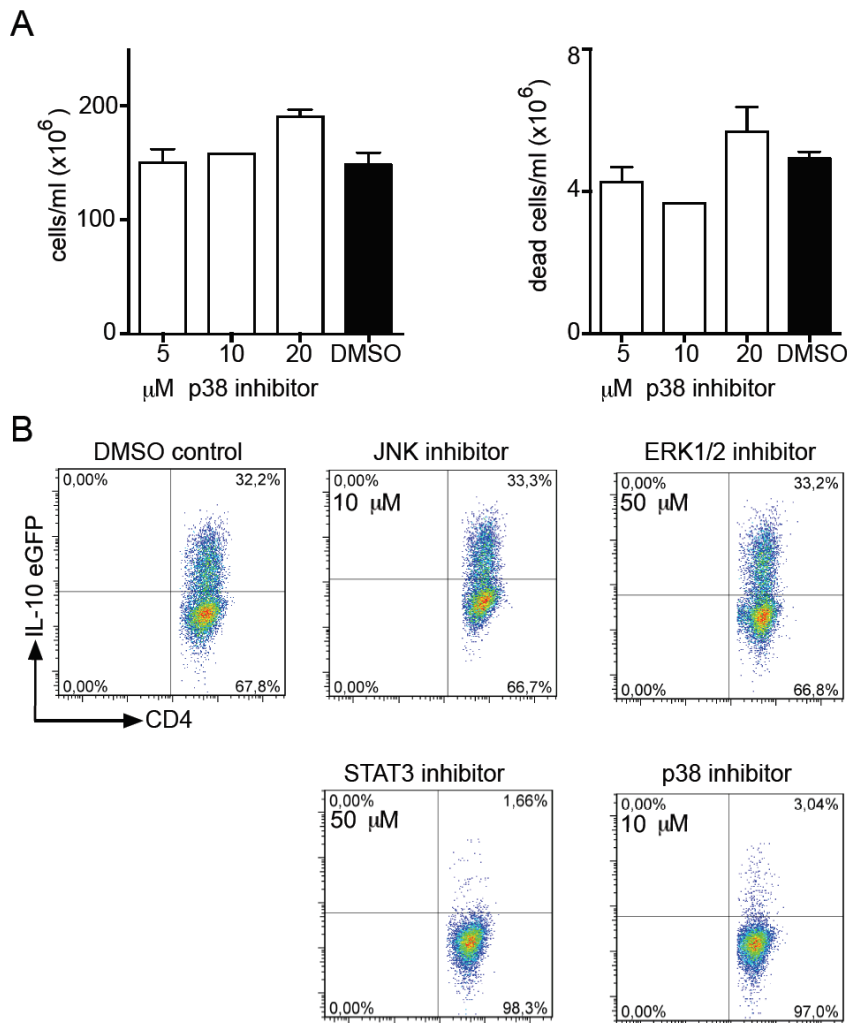

**Fig. S4. p38 MAPK inhibition does not result in an increased proliferation of IL-10 negative cells and blocks the differentiation of T<sub>R</sub>1 cells *in vitro*.** (A) CD4<sup>+</sup> T cells were isolated from wild type Foxp3<sup>RFP</sup> IL-10<sup>eGFP</sup> double reporter mice, cultured under T<sub>R</sub>1 polarizing conditions and re-stimulated for 48 hours with or without SB 203580 (p38 inhibitor). Number of total cells in the culture and number of dead cells are shown. (B) CD4<sup>+</sup> T cells were isolated from wild type Foxp3<sup>RFP</sup> IL-10<sup>eGFP</sup> reporter mice and cultured under T<sub>R</sub>1 polarizing conditions with or without JNK inhibitor II, PD 98059 (ERK1/2 inhibitor), STAT3 inhibitor VI or SB 203580 (p38 inhibitor). Representative dot plots of two independent experiments are shown.
